# Supplementary material
Source: PubMed Central journal article supplement (PMC3885173)
Supplement: NIHMS534218-supplement-Supporting_Information.pdf [file NIHMS534218-supplement-Supporting_Information.pdf]

## Supporting Information

### Mechanistic Studies on the Reaction of Nitrocobalamin with Glutathione: Kinetic evidence for formation of an aquacobalamin intermediate.

David T. Walker, Rohan S. Dassanayake, Kamille A. Garcia, Riya Mukherjee and Nicola E. Brasch

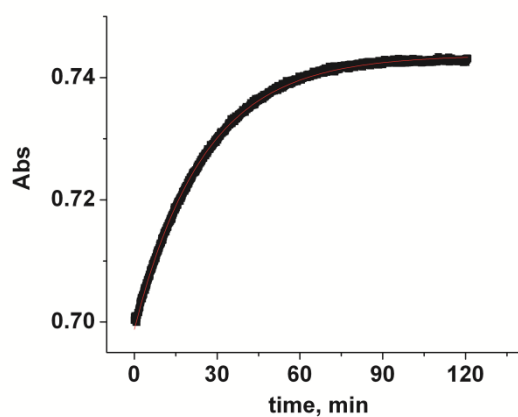

**Figure S1.** Plot of absorbance versus time for the decomposition of GSCbl ( $4.0 \times 10^{-5}$  M) at pH 4.00. Data has been fitted to a first-order rate equation, giving  $k_{-2} = (7.4 \pm 0.5) \times 10^{-4} \text{ s}^{-1}$ .

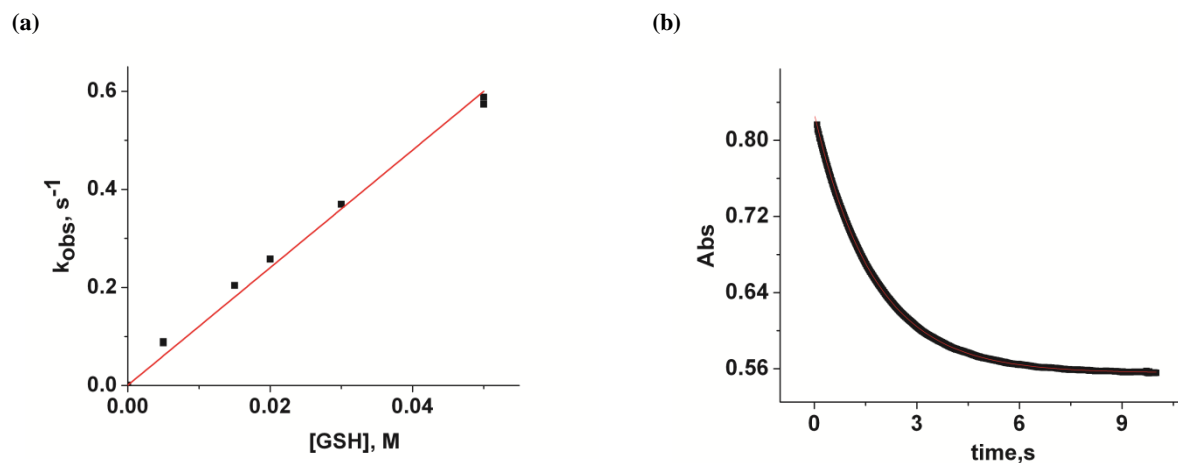

**Figure S2.** (a) Plot of observed rate constant,  $k_{\text{obs}}$ , versus GSH concentration for the reaction between  $\text{H}_2\text{OCbl}^+$  ( $5.0 \times 10^{-5}$  M) and varying concentrations of GSH at pH 4.00 (25.0 °C, 0.020 M NaOAc,  $I = 1.0$  M,  $\text{NaCF}_3\text{SO}_3$ ). Data have been fitted to a line passing through  $7.4 \times 10^{-4} \text{ s}^{-1}$  (see Figure S1), giving  $k_2 = 12.00 \pm 0.25 \text{ M}^{-1} \text{ s}^{-1}$ . (b) Typical plot of absorbance at 354 nm versus time for the reaction of  $\text{H}_2\text{OCbl}^+$  with GSH ( $5.00 \times 10^{-2}$  M) at pH 4.00. Data were fitted to a first-order rate equation, giving  $k_{\text{obs}} = 0.574 \pm 0.001 \text{ s}^{-1}$ .

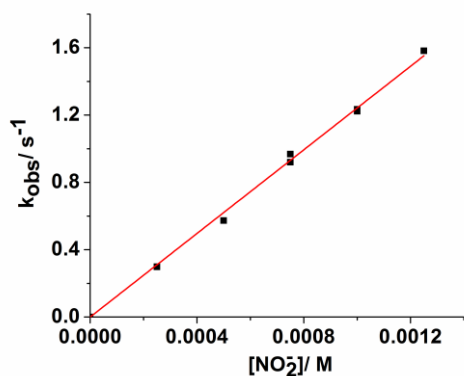

**Figure S3.** Plot of  $k_{\text{obs}}$  versus nitrite concentration for the reaction between  $\text{H}_2\text{OCbl}^+$  ( $5.0 \times 10^{-5} \text{ M}$ ) with varying concentrations of nitrite at pH 4.00 (25.0 °C, 0.020M NaOAc,  $I = 1.0 \text{ M}$ ,  $\text{NaCF}_3\text{SO}_3$ ). Data have been fitted to a line passing through the origin, giving  $k_{-1} = (1.25 \pm 0.02) \times 10^3 \text{ M}^{-1} \text{ s}^{-1}$ .

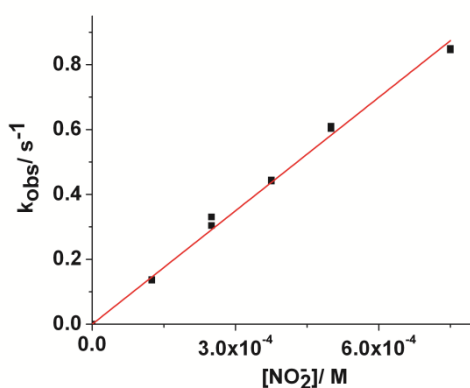

**Figure S4.** Plot of  $k_{\text{obs}}$  versus nitrite concentration for the reaction between  $\text{H}_2\text{OCbl}^+$  ( $5.0 \times 10^{-5} \text{ M}$ ) with varying concentrations of nitrite at pH 7.00 (25.0 °C, 0.020 M  $\text{KH}_2\text{PO}_4$ ,  $I = 1.0 \text{ M}$ ,  $\text{NaCF}_3\text{SO}_3$ ). Data have been fitted to a line passing through the origin, giving  $k_{-1} = (1.20 \pm 0.02) \times 10^3 \text{ M}^{-1} \text{ s}^{-1}$ .

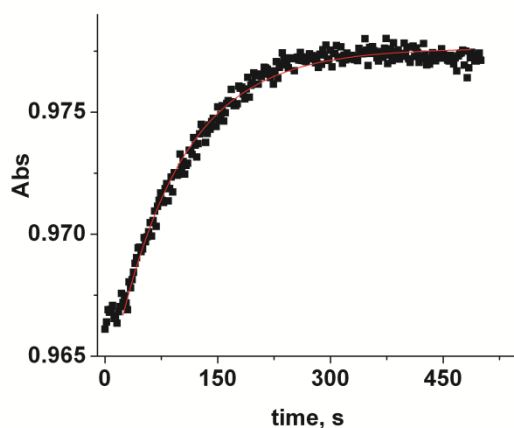

**Figure S5.** Plot of absorbance at 350 nm versus time for the partial decomposition of  $\text{NO}_2\text{Cbl}$  ( $5.0 \times 10^{-5} \text{ M}$ ) to  $\text{H}_2\text{OCbl}^+$  at pH 4.00 (25.0 °C, 0.020 M NaOAc,  $I = 1.0 \text{ M}$ ,  $\text{NaCF}_3\text{SO}_3$ ). Data has been fitted to a first-order rate equation, giving  $k_{\text{obs}} = (1.58 \pm 0.01) \times 10^{-2} \text{ s}^{-1}$ . The overall absorbance change is 0.013.

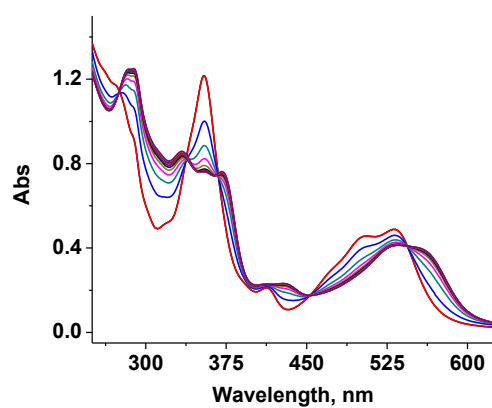

**Figure S6.** UV-vis spectra for the reaction of GSH ( $5.00 \times 10^{-2}$  M) with  $\text{NO}_2\text{Cbl}$  ( $6.0 \times 10^{-5}$  M) at pH 7.00 (25.0 °C, 0.020 M  $\text{KH}_2\text{PO}_4$ ,  $I = 1.0$  M,  $\text{NaCF}_3\text{SO}_3$ ). Selected spectra for the reaction are shown every 1.00 min. Clean isobestic points are observed.

**Table 1.** Observed rate constants for the partial decomposition of  $\text{NO}_2\text{Cbl}$  to  $\text{H}_2\text{OCbl}^+$  (25 °C, 0.20 M buffer,  $I = 1.0$  M ( $\text{NaCF}_3\text{SO}_3$ )). The mean value is  $(1.48 \pm 0.22) \times 10^{-2} \text{ s}^{-1}$ .

| pH   | $10^2 k_{\text{obs}}(\text{s}^{-1})$ |      |      |
|------|--------------------------------------|------|------|
| 3.50 | 1.69                                 | 1.88 | 1.40 |
| 4.00 | 1.55                                 | 1.58 | 1.61 |
| 4.50 | 1.35                                 | 1.45 | 1.68 |
| 6.00 | 1.20                                 | 1.15 | 1.23 |
